# Supplementary material for: Nanoparticles of the poly([N-(2-hydroxypropyl)]methacrylamide)-b-poly[2-(diisopropylamino)ethyl methacrylate] diblock copolymer for pH-triggered release of paclitaxel
Source: Royal Society of Chemistry journal article supplement (doi:10.1039/c5py00567a), 2015-01-01
Supplement: c5py00567a1.pdf [file c5py00567a1.pdf]

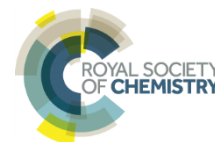

## Polymer Chemistry

Electronic Supporting Information for

# Nanoparticles of poly([N-(2-hydroxypropyl)]methacrylamide)-*b*-poly[2-(diisopropylamino)ethyl methacrylate] diblock copolymer for pH-triggered release of paclitaxel

Alessandro Jäger,<sup>a\*</sup> Eliézer Jäger,<sup>a\*</sup> František Surman,<sup>a</sup> Anita Höcherl,<sup>a</sup> Borislav Angelov,<sup>a</sup> Karel Ulbrich,<sup>a</sup> Markus Drechsler,<sup>b</sup>

Vasil M. Garamus,<sup>c</sup> Cesar Rodriguez-Emmenegger,<sup>a\*</sup> Frédéric Nallet<sup>d</sup> and Petr Štěpánek<sup>a</sup>

<sup>a</sup>. Institute of Macromolecular Chemistry, Heyrovsky Sq. 2, 162 06 Prague 6, Czech Republic.

<sup>b</sup>. Laboratory for Soft Matter Electron Microscopy, Bayreuth Institute of Macromolecular Research, University of Bayreuth, D-95440 Bayreuth, Germany.

<sup>c</sup>. Helmholtz-Zentrum Geesthacht, Centre for Materials and Coastal Research, D-21502 Geesthacht, Germany.

<sup>d</sup>. Centre de Recherches Paul-Pascal, CNRS, Université de Bordeaux, 115 Avenue Schweitzer, F-33600 Pessac, France.

Email: [ajager@imc.cas.cz](mailto:ajager@imc.cas.cz), [jager@imc.cas.cz](mailto:jager@imc.cas.cz) and [rodriguez@imc.cas.cz](mailto:rodriguez@imc.cas.cz)

Tel: +420 296 809 322;

## Characterization of PHPMA

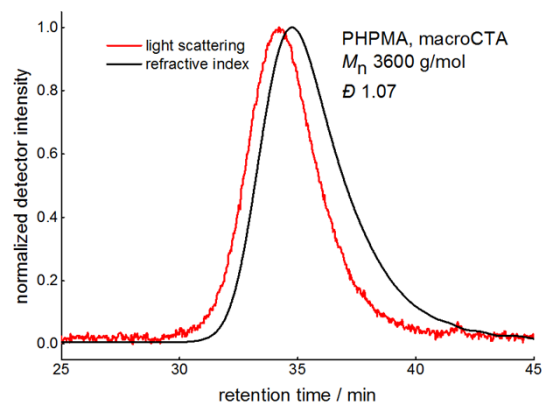

Figure S1A. SEC traces of the PHPMA macroCTA chain transfer agent utilized as macromolecular chain transfer agent for block copolymer synthesis *via* RAFT.

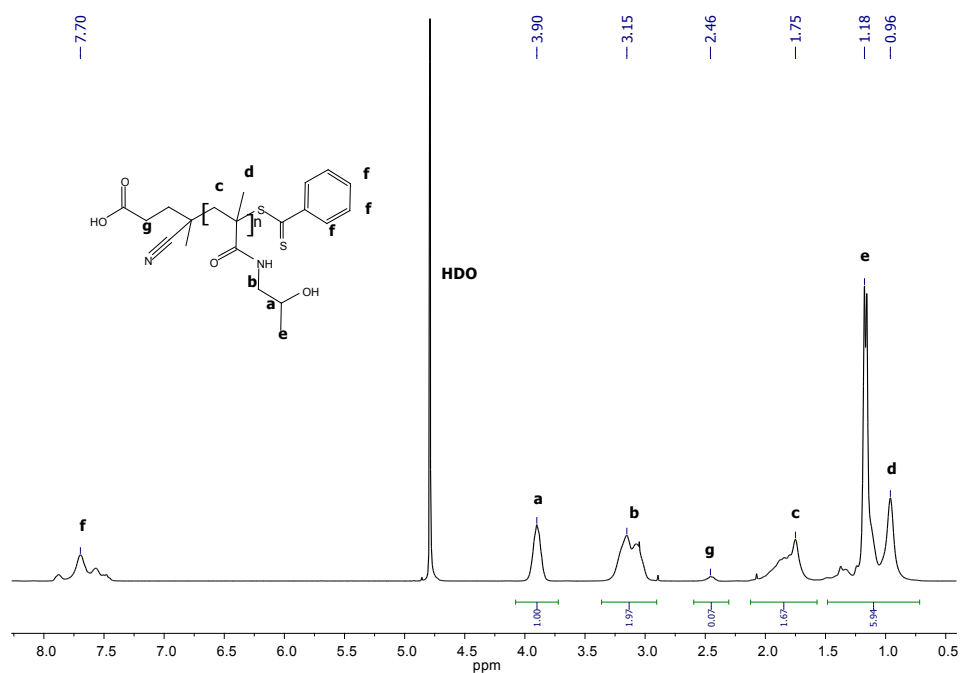

Figure S1B.  $^1\text{H}$  NMR spectra of the PHPMA in  $\text{D}_2\text{O}$ .

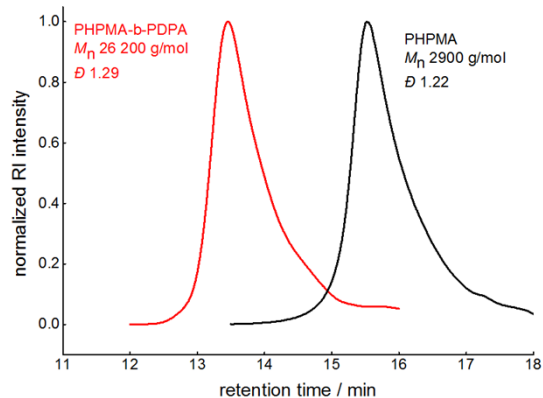

Figure S2A. SEC traces of the PHPMA<sub>25</sub>-*b*-PDPA<sub>106</sub> block copolymer synthesized *via* RAFT.

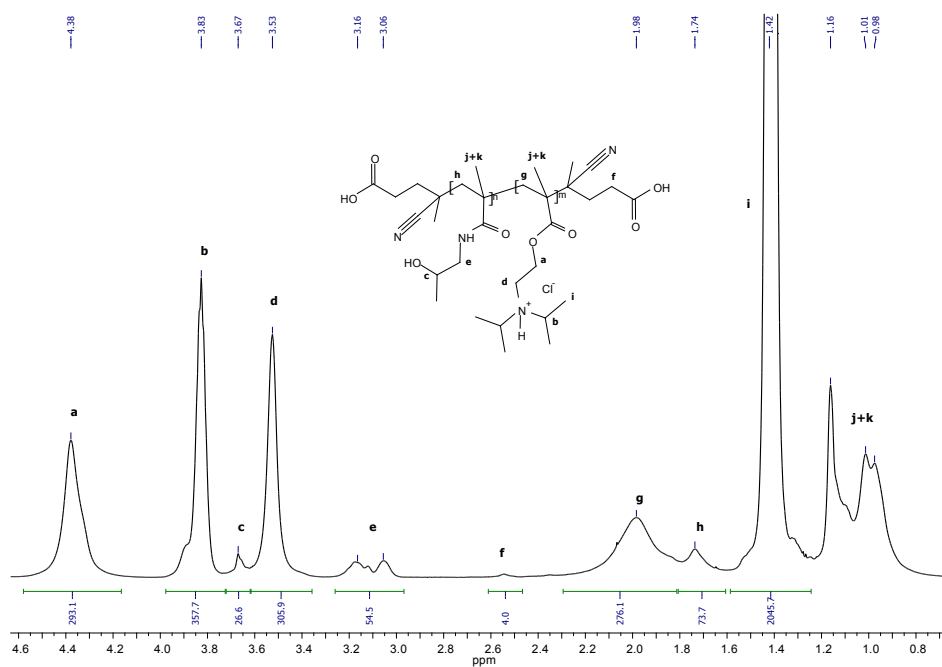

Fig. S2B. <sup>1</sup>H NMR spectra of the PHPMA<sub>25</sub>-*b*-PDPA<sub>106</sub> in D<sub>2</sub>O/DCl (pH 2).

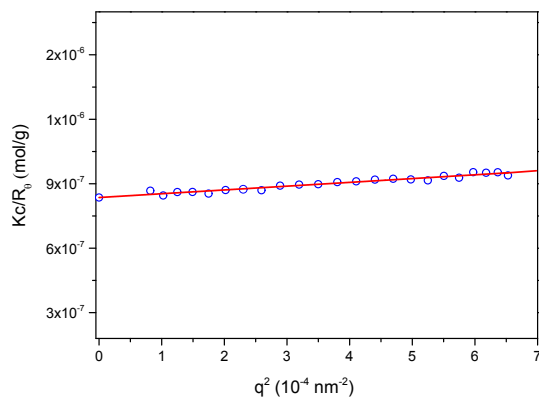

Fig. S3. Static light scattering measurements ( $Kc/R_{90}$  vs.  $q^2$ ) for PHPMA<sub>25</sub>-*b*-PDPA<sub>106</sub> block copolymer NPs in PBS at 25 °C ( $R_G \sim 24$  nm and  $M_w \sim 1.2 \times 10^6$  g/mol).

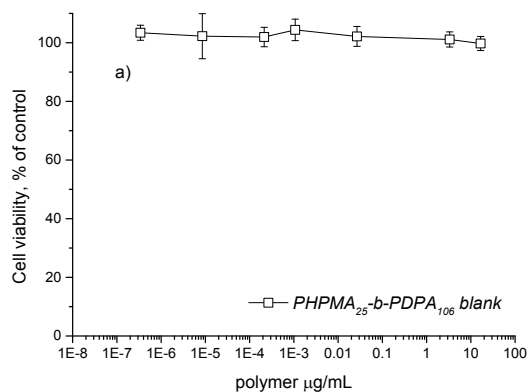

Fig. S4A. Cell viability of HeLa cell line after 24 h incubation with different concentrations of drug-free PHPMA<sub>25</sub>-*b*-PDPA<sub>106</sub> block copolymer NPs.

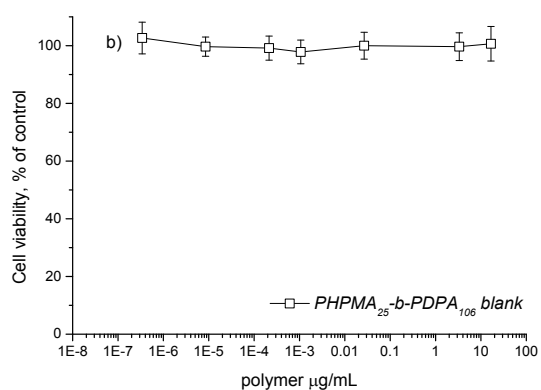

Fig. S4B. Cell viability of HeLa cell line after 48 h incubation with different concentrations of drug-free PHPMA<sub>25</sub>-*b*-PDPA<sub>106</sub> block copolymer NPs.

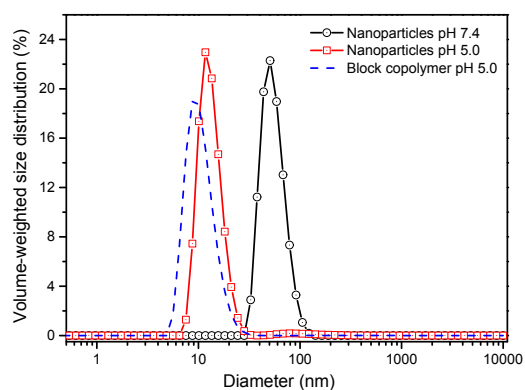

**Fig. S5.** Volume-weighted size distribution for the PHPMA<sub>25</sub>-*b*-PDPA<sub>106</sub> NPs at pH 7.4 (black open circles) for the nanoparticles at pH 5.0 (red open squares) and the single block copolymer at pH 5.0 (blue dashed lines) and angle 173° at concentration of 1 mg·mL<sup>-1</sup> diluted in PBS at 37 °C.

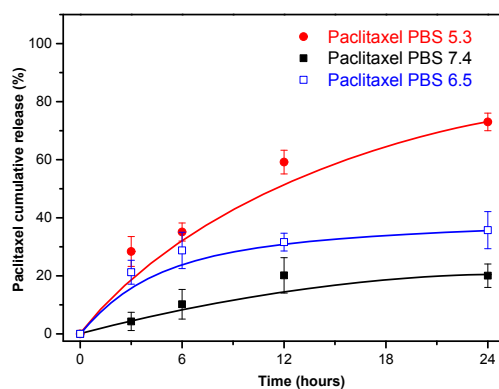

**Fig. S6.** Drug release profiles from paclitaxel-loaded PHPMA<sub>25</sub>-*b*-PDPA<sub>106</sub> block copolymer NPs at pH of simulated transport in blood, at pH 6.5 (end stage of protonated process) and simulating the acidic environment in endosomal and lysosomal compartments at 37 °C.

**Supporting Table ST1.** Synthetic parameters and molecular weight data of polymers prepared via RAFT polymerization.

| Sample                                              | $[M]_0/[CTA]_0/[I]_0$ | Time (h) | Conv. (%) <sup>a</sup> | $M_{n,th}^b$           | $M_{n,SEC}^c$                 | $D^c$                       |
|-----------------------------------------------------|-----------------------|----------|------------------------|------------------------|-------------------------------|-----------------------------|
|                                                     |                       |          |                        | (g mol <sup>-1</sup> ) |                               |                             |
| PHPMA <sub>25</sub>                                 | 120/2/1 <sup>e</sup>  | 10       | 36                     | 3 200                  | 3 600 <sup>d</sup><br>(2 900) | 1.07 <sup>d</sup><br>(1.22) |
| PHPMA <sub>25</sub> - <i>b</i> -PDPA <sub>106</sub> | 300/3/1 <sup>f</sup>  | 15       | 94                     | 23 500                 | 26 200                        | 1.29                        |

<sup>a</sup> Determined by <sup>1</sup>H NMR in D<sub>2</sub>O.

<sup>b</sup> Theoretical  $M_n = [M]_0/[CTA]_0 \times \text{conv.} \times MW_{\text{mon.}} + MW_{\text{CTA}}$

<sup>c</sup> Determined by SEC in THF/MeOH 80/20% using PMMA as standard

<sup>d</sup> Determined by SEC in acetate buffer pH 6.5 using light scattering and RI detectors

<sup>e</sup> conditions: DMAc,  $[M]_0 = 1.2 \text{ M}$ , 70 °C

<sup>f</sup> conditions: 1,4-dioxane/MeOH 60/40 vol.%,  $[M]_0 = 3 \text{ M}$ , 70 °C
